# Supplementary material for: Physical Training vs. Perindopril Treatment on Arterial Stiffening of Spontaneously Hypertensive Rats: A Proteomic Analysis and Possible Mechanisms
Source: MDPI journal article supplement (doi:10.3390/biomedicines11051381), 2023-05-06
Supplement: s1 [file s1]

## Supplementary Material

**Table S1:** Protein analysis in ClueGO plugins and the number of genes involved within the process biologic category between SHRP vs. SHRC groups.

| <i>Process Biologic</i>                                                             |                  |
|-------------------------------------------------------------------------------------|------------------|
| <i>Term</i>                                                                         | <b>Nr. Genes</b> |
| <i>cellular response to epidermal growth factor stimulus</i>                        | 3.00             |
| <i>collagen fibril organization</i>                                                 | 3.00             |
| <i>structural constituent of cytoskeleton</i>                                       | 22.00            |
| <i>mitochondrial electron transport. cytochrome c to oxygen</i>                     | 2.00             |
| <i>protein homotetramerization</i>                                                  | 3.00             |
| <i>cellular response to interleukin-4</i>                                           | 4.00             |
| <i>cerebellar cortex development</i>                                                | 4.00             |
| <i>regulation of mitotic spindle organization</i>                                   | 3.00             |
| <i>acute-phase response</i>                                                         | 5.00             |
| <i>stress response to metal ion</i>                                                 | 2.00             |
| <i>positive regulation of axon guidance</i>                                         | 2.00             |
| <i>endothelial cell chemotaxis</i>                                                  | 2.00             |
| <i>dendritic cell chemotaxis</i>                                                    | 3.00             |
| <i>glial cell proliferation</i>                                                     | 7.00             |
| <i>hydrogen peroxide metabolic process</i>                                          | 5.00             |
| <i>platelet activation</i>                                                          | 6.00             |
| <i>chondroitin sulfate proteoglycan metabolic process</i>                           | 2.00             |
| <i>regulation of transepithelial transport</i>                                      | 2.00             |
| <i>response to lead ion</i>                                                         | 4.00             |
| <i>sarcomere organization</i>                                                       | 6.00             |
| <i>mesenchyme migration</i>                                                         | 4.00             |
| <i>regulation of protein dephosphorylation</i>                                      | 9.00             |
| <i>establishment or maintenance of epithelial cell apical/basal polarity</i>        | 4.00             |
| <i>regulation of cholesterol metabolic process</i>                                  | 2.00             |
| <i>lactate metabolic process</i>                                                    | 3.00             |
| <i>response to hydrogen peroxide</i>                                                | 16.00            |
| <i>regulation of oxidative stress-induced intrinsic apoptotic signaling pathway</i> | 5.00             |
| <i>ventricular system development</i>                                               | 2.00             |
| <i>energy derivation by oxidation of organic compounds</i>                          | 19.00            |
| <i>intermediate filament organization</i>                                           | 11.00            |
| <i>positive regulation of blood vessel endothelial cell migration</i>               | 5.00             |
| <i>regulation of calcium-mediated signaling</i>                                     | 5.00             |
| <i>thioester biosynthetic process</i>                                               | 2.00             |
| <i>structural constituent of synapse</i>                                            | 7.00             |
| <i>cellular response to reactive oxygen species</i>                                 | 11.00            |
| <i>regulation of NIK/NF-kappaB signaling</i>                                        | 6.00             |
| <i>actin filament fragmentation</i>                                                 | 2.00             |
| <i>response to platinum ion</i>                                                     | 2.00             |
| <i>negative regulation of extrinsic apoptotic signaling pathway</i>                 | 6.00             |
| <i>ribonucleoside metabolic process</i>                                             | 2.00             |
| <i>cellular response to cadmium ion</i>                                             | 2.00             |

|                                                                                    |       |
|------------------------------------------------------------------------------------|-------|
| <i>positive regulation of viral process</i>                                        | 4.00  |
| <i>cellular oxidant detoxification</i>                                             | 9.00  |
| <i>regulation of response to oxidative stress</i>                                  | 10.00 |
| <i>negative regulation of vascular associated smooth muscle cell proliferation</i> | 6.00  |
| <i>ATP-dependent protein folding chaperone</i>                                     | 8.00  |
| <i>positive regulation of epithelial cell migration</i>                            | 9.00  |
| <i>purine-containing compound biosynthetic process</i>                             | 11.00 |
| <i>chaperone-mediated protein folding</i>                                          | 8.00  |
| <i>negative regulation of striated muscle cell apoptotic process</i>               | 2.00  |
| <i>regulation of wound healing</i>                                                 | 7.00  |
| <i>purine ribonucleoside triphosphate biosynthetic process</i>                     | 7.00  |
| <i>structural constituent of postsynapse</i>                                       | 5.00  |
| <i>supramolecular fiber organization</i>                                           | 44.00 |
| <i>peroxidase activity</i>                                                         | 6.00  |
| <i>fatty acid beta-oxidation</i>                                                   | 7.00  |
| <i>regulation of polysaccharide biosynthetic process</i>                           | 2.00  |
| <i>structural constituent of postsynaptic intermediate filament cytoskeleton</i>   | 2.00  |
| <i>intermediate filament cytoskeleton organization</i>                             | 11.00 |
| <i>pyrimidine nucleoside triphosphate biosynthetic process</i>                     | 2.00  |
| <i>negative regulation of exocytosis</i>                                           | 4.00  |
| <i>male meiosis I</i>                                                              | 4.00  |
| <i>blood vessel endothelial cell migration</i>                                     | 7.00  |
| <i>dopamine receptor signaling pathway</i>                                         | 5.00  |
| <i>response to reactive oxygen species</i>                                         | 20.00 |
| <i>regulation of vascular associated smooth muscle cell proliferation</i>          | 9.00  |
| <i>response to inorganic substance</i>                                             | 43.00 |

**Table S2:** Protein analysis in ClueGO plug-ins and the number of genes involved within the process biological category between SHR<sub>T</sub> vs SHR<sub>C</sub> groups.

| <i>Process Biological</i>                                             |                  |
|-----------------------------------------------------------------------|------------------|
| <i>Term</i>                                                           | <b>Nr. Genes</b> |
| <i>collagen fibril organization</i>                                   | 4.00             |
| <i>regulation of cholesterol metabolic process</i>                    | 3.00             |
| <i>cellular response to epidermal growth factor stimulus</i>          | 4.00             |
| <i>tricarboxylic acid metabolic process</i>                           | 2.00             |
| <i>negative regulation of blood vessel endothelial cell migration</i> | 2.00             |
| <i>acute-phase response</i>                                           | 6.00             |
| <i>fatty acid beta-oxidation using acyl-CoA dehydrogenase</i>         | 3.00             |
| <i>regulation of protein dephosphorylation</i>                        | 5.00             |
| <i>positive regulation of bone resorption</i>                         | 2.00             |
| <i>response to lead ion</i>                                           | 4.00             |
| <i>cardiac epithelial to mesenchymal transition</i>                   | 2.00             |
| <i>sarcomere organization</i>                                         | 4.00             |
| <i>actomyosin structure organization</i>                              | 11.00            |
| <i>response to heat</i>                                               | 10.00            |
| <i>cellular oxidant detoxification</i>                                | 7.00             |
| <i>regulation of reactive oxygen species metabolic process</i>        | 9.00             |
| <i>nucleus localization</i>                                           | 2.00             |
| <i>hydrogen peroxide metabolic process</i>                            | 5.00             |
| <i>superoxide metabolic process</i>                                   | 6.00             |
| <i>positive regulation of gliogenesis</i>                             | 5.00             |
| <i>ATP-dependent protein folding chaperone</i>                        | 7.00             |
| <i>response to ATP</i>                                                | 2.00             |
| <i>negative regulation of extrinsic apoptotic signaling pathway</i>   | 6.00             |
| <i>cellular response to fatty acid</i>                                | 5.00             |
| <i>positive regulation of sterol transport</i>                        | 2.00             |
| <i>mesenchyme migration</i>                                           | 4.00             |
| <i>myofibril assembly</i>                                             | 8.00             |
| <i>protein refolding</i>                                              | 5.00             |
| <i>gluconeogenesis</i>                                                | 5.00             |
| <i>face morphogenesis</i>                                             | 2.00             |
| <i>regulation of superoxide metabolic process</i>                     | 4.00             |
| <i>negative regulation of ion transmembrane transport</i>             | 7.00             |
| <i>collagen biosynthetic process</i>                                  | 4.00             |
| <i>cerebellar Purkinje cell layer development</i>                     | 4.00             |
| <i>negative regulation of striated muscle cell apoptotic process</i>  | 2.00             |
| <i>structural constituent of synapse</i>                              | 4.00             |
| <i>fibrinolysis</i>                                                   | 3.00             |
| <i>negative regulation of hyaluronan biosynthetic process</i>         | 2.00             |
| <i>chaperone cofactor-dependent protein refolding</i>                 | 5.00             |
| <i>protein localization to chromatin</i>                              | 2.00             |
| <i>positive regulation of lamellipodium organization</i>              | 2.00             |
| <i>cellular response to butyrate</i>                                  | 2.00             |
| <i>regulation of dopamine biosynthetic process</i>                    | 2.00             |

|                                                            |      |
|------------------------------------------------------------|------|
| <i>regulation of wound healing</i>                         | 8.00 |
| <i>regulation of cellular response to oxidative stress</i> | 7.00 |
| <i>actin filament fragmentation</i>                        | 3.00 |
| <i>protein folding chaperone</i>                           | 8.00 |
| <i>regulation of response to oxidative stress</i>          | 8.00 |

**Table S3.** The protein of comparison SHRP vs. SHRC. 138 proteins were identified, with 73 *upregulated* and 2 *downregulated* significantly in the first group of the comparison and unique from each group with  $p < 0.05^{**}$ .

| <i>c</i> cession <sup>a</sup> | <i>Description</i>                        | <i>Score</i> | <i>SHRP:SHRC_</i><br><i>Ratio</i> <sup>b</sup> | <i>SHRP:SHRC_</i> <i>P</i> <sup>c</sup> | <i>Up /</i><br><i>intermediate /</i><br><i>Down</i> <sup>d</sup> |
|-------------------------------|-------------------------------------------|--------------|------------------------------------------------|-----------------------------------------|------------------------------------------------------------------|
| Q9ER34                        | Aconitate hydratase_ mitochondrial        | 83           | 1.67                                           | < 0.01                                  | ↑                                                                |
| P68035                        | Actin_ alpha cardiac muscle 1             | 5542         | 1.07                                           | < 0.01                                  | ↑                                                                |
| P68136                        | Actin_ alpha skeletal muscle              | 5242         | 1.07                                           | < 0.01                                  | ↑                                                                |
| P62738                        | Actin_ aortic smooth muscle               | 5534         | 1.07                                           | < 0.01                                  | ↑                                                                |
| P60711                        | Actin_ cytoplasmic 1                      | 4354         | 1.12                                           | < 0.01                                  | ↑                                                                |
| P63259                        | Actin_ cytoplasmic 2                      | 4358         | 1.12                                           | < 0.01                                  | ↑                                                                |
| P63269                        | Actin_ gamma-enteric smooth muscle        | 5534         | 1.07                                           | < 0.01                                  | ↑                                                                |
| Q9Z1P2                        | Alpha-actinin-1                           | 719          | 1.30                                           | < 0.01                                  | ↑                                                                |
| Q9QXQ0                        | Alpha-actinin-4                           | 431          | 1.31                                           | < 0.01                                  | ↑                                                                |
| Q07936                        | Annexin A2                                | 474          | 1.38                                           | < 0.01                                  | ↑                                                                |
| P15999                        | ATP synthase subunit alpha_ mitochondrial | 175          | 1.54                                           | < 0.01                                  | ↑                                                                |
| P10719                        | ATP synthase subunit beta_ mitochondrial  | 87           | 1.38                                           | < 0.01                                  | ↑                                                                |
| P47853                        | Biglycan                                  | 227          | 1.72                                           | < 0.01                                  | ↑                                                                |
| P02454                        | Collagen alpha-1(I) chain                 | 47           | 1.88                                           | < 0.01                                  | ↑                                                                |
| P47875                        | Cysteine and glycine-rich protein 1       | 1148         | 1.45                                           | < 0.01                                  | ↑                                                                |
| P36201                        | Cysteine-rich protein 2                   | 176          | 1.63                                           | < 0.01                                  | ↑                                                                |
| P48675                        | Desmin                                    | 467          | 1.26                                           | < 0.01                                  | ↑                                                                |
| Q4V8H8                        | EH domain-containing protein 2            | 225          | 1.45                                           | < 0.01                                  | ↑                                                                |
| P62630                        | Elongation factor 1-alpha 1               | 298          | 1.62                                           | < 0.01                                  | ↑                                                                |
| P70623                        | Fatty acid-binding protein_ adipocyte     | 436          | 1.60                                           | < 0.01                                  | ↑                                                                |
| P06399                        | Fibrinogen alpha chain                    | 112          | 1.32                                           | < 0.01                                  | ↑                                                                |
| Q9WVH8                        | Fibulin-5                                 | 52           | 1.32                                           | < 0.01                                  | ↑                                                                |
| P11762                        | Galectin-1                                | 260          | 1.75                                           | < 0.01                                  | ↑                                                                |
| P08010                        | Glutathione S-transferase Mu 2            | 217          | 1.58                                           | < 0.01                                  | ↑                                                                |
| P0DMW0                        | Heat shock 70 kDa protein 1A              | 849          | 1.28                                           | < 0.01                                  | ↑                                                                |
| P55063                        | Heat shock 70 kDa protein 1-like          | 597          | 1.31                                           | < 0.01                                  | ↑                                                                |
| P63018                        | Heat shock cognate 71 kDa protein         | 852          | 1.36                                           | < 0.01                                  | ↑                                                                |
| P42930                        | Heat shock protein beta-1                 | 848          | 1.54                                           | < 0.01                                  | ↑                                                                |
| P14659                        | Heat shock-related 70 kDa protein 2       | 691          | 1.39                                           | < 0.01                                  | ↑                                                                |
| Q6IG12                        | Keratin_ type II cytoskeletal 7           | 193          | 1.67                                           | < 0.01                                  | ↑                                                                |
| Q10758                        | Keratin_ type II cytoskeletal 8           | 193          | 1.70                                           | < 0.01                                  | ↑                                                                |
| P18666                        | Myosin regulatory light chain 12B         | 975          | 1.27                                           | < 0.01                                  | ↑                                                                |
| Q64122                        | Myosin regulatory light polypeptide 9     | 4053         | 1.34                                           | < 0.01                                  | ↑                                                                |
| Q9JLT0                        | Myosin-10                                 | 71           | 1.49                                           | < 0.01                                  | ↑                                                                |
| Q62812                        | Myosin-9                                  | 68           | 1.52                                           | < 0.01                                  | ↑                                                                |
| P10111                        | Peptidyl-prolyl cis-trans isomerase A     | 1750         | 1.42                                           | < 0.01                                  | ↑                                                                |
| P62963                        | Profilin-1                                | 3064         | 1.19                                           | < 0.01                                  | ↑                                                                |
| P02770                        | Serum albumin                             | 7160         | 1.09                                           | < 0.01                                  | ↑                                                                |
| P31232                        | Transgelin                                | 9127         | 1.40                                           | < 0.01                                  | ↑                                                                |
| P68370                        | Tubulin alpha-1A chain                    | 237          | 1.67                                           | < 0.01                                  | ↑                                                                |
| Q6P9V9                        | Tubulin alpha-1B chain                    | 237          | 1.67                                           | < 0.01                                  | ↑                                                                |
| Q6AYZ1                        | Tubulin alpha-1C chain                    | 237          | 1.68                                           | < 0.01                                  | ↑                                                                |
| Q68FR8                        | Tubulin alpha-3 chain                     | 111          | 1.84                                           | < 0.01                                  | ↑                                                                |

|          |                                                              |           |             |                  |      |
|----------|--------------------------------------------------------------|-----------|-------------|------------------|------|
| Q5XIF6   | Tubulin alpha-4A chain                                       | 107       | 1.73        | < 0.01           | ↑    |
| Q6AY56   | <b>Tubulin alpha-8 chain</b>                                 | <b>46</b> | <b>2.20</b> | <b>&lt; 0.01</b> | ↑    |
| P85108   | Tubulin beta-2A chain                                        | 94        | 1.49        | < 0.01           | ↑    |
| Q3KRE8   | Tubulin beta-2B chain                                        | 94        | 1.49        | < 0.01           | ↑    |
| Q4QRB4   | Tubulin beta-3 chain                                         | 94        | 1.48        | < 0.01           | ↑    |
| Q6P9T8   | Tubulin beta-4B chain                                        | 467       | 1.48        | < 0.01           | ↑    |
| P69897   | Tubulin beta-5 chain                                         | 94        | 1.49        | < 0.01           | ↑    |
| P31000   | Vimentin                                                     | 1733      | 1.23        | < 0.01           | ↑    |
| Q5RKI0   | WD repeat-containing protein 1                               | 192       | 1.32        | < 0.01           | ↑    |
| P07150 * | Annexin A1                                                   | 94        | 1.52        | 0.01             | ↑    |
| P85125   | Caveolae-associated protein 1                                | 150       | 1.51        | 0.01             | ↑    |
| P06761   | Endoplasmic reticulum chaperone BiP                          | 248       | 1.22        | 0.01             | ↑    |
| P0DMW1   | Heat shock 70 kDa protein 1B                                 | 845       | 1.30        | 0.01             | ↑    |
| Q00715   | Histone H2B type 1                                           | 122       | 1.48        | 0.01             | ↑    |
| P15650   | Long-chain specific acyl-CoA dehydrogenase_<br>mitochondrial | 93        | 1.51        | 0.01             | ↑    |
| P02600   | Myosin light chain 1/3_ skeletal muscle isoform              | 809       | 1.28        | 0.01             | ↑    |
| P16409   | Myosin light chain 3                                         | 787       | 1.30        | 0.01             | ↑    |
| P13832   | Myosin regulatory light chain RLC-A                          | 975       | 1.26        | 0.01             | ↑    |
| P85973   | Purine nucleoside phosphorylase                              | 155       | 1.31        | 0.01             | ↑    |
| Q7M0E3   | Dextrin                                                      | 1706      | 1.22        | 0.02             | ↑    |
| P20760   | Ig gamma-2A chain C region                                   | 643       | 1.13        | 0.02             | ↑    |
| Q62736   | Non-muscle caldesmon                                         | 274       | 1.72        | 0.02             | ↑    |
| P21807   | Peripherin                                                   | 195       | 1.35        | 0.02             | ↑    |
| P12346   | Serotransferrin                                              | 1002      | 1.14        | 0.02             | ↑    |
| P63102   | 14-3-3 protein zeta/delta                                    | 142       | 1.34        | 0.03             | ↑    |
| Q01129   | Decorin                                                      | 150       | 1.55        | 0.03             | ↑    |
| P05065   | Fructose-bisphosphate aldolase A                             | 202       | 1.26        | 0.03             | ↑    |
| Q6P6Q2   | Keratin_ type II cytoskeletal 5                              | 76        | 1.70        | 0.03             | ↑    |
| P04636   | Malate dehydrogenase_ mitochondrial                          | 346       | 1.40        | 0.03             | ↑    |
| Q5XI73   | Rho GDP-dissociation inhibitor 1                             | 327       | 1.36        | 0.04             | ↑    |
| P14668 * | Annexin A5                                                   | 145       | 1.25        | 0.95             | ---- |
| P04797   | Glyceraldehyde-3-phosphate dehydrogenase                     | 1896      | 1.13        | 0.95             | ---- |
| A6YP92   | Homeobox protein ARX                                         | 33        | 1.75        | 0.95             | ---- |
| P11598   | Protein disulfide-isomerase A3                               | 100       | 1.42        | 0.95             | ---- |
| P16636   | Protein-lysine 6-oxidase                                     | 251       | 1.46        | 0.95             | ---- |
| P50398   | Rab GDP dissociation inhibitor alpha                         | 112       | 1.79        | 0.95             | ---- |
| Q64119   | Myosin light polypeptide 6                                   | 13395     | 1.09        | 0.94             | ---- |
| P25113   | Phosphoglycerate mutase 1                                    | 276       | 1.55        | 0.94             | ---- |
| P50137   | Transketolase                                                | 50        | 1.40        | 0.94             | ---- |
| P48037   | Annexin A6                                                   | 120       | 1.15        | 0.93             | ---- |
| P34058   | Heat shock protein HSP 90-beta                               | 106       | 1.67        | 0.93             | ---- |
| P23565   | Alpha-internexin                                             | 69        | 1.31        | 0.90             | ---- |
| P62632   | Elongation factor 1-alpha 2                                  | 51        | 2.03        | 0.90             | ---- |
| P02680   | Fibrinogen gamma chain                                       | 682       | 1.19        | 0.90             | ---- |
| P20761   | Ig gamma-2B chain C region                                   | 130       | 1.19        | 0.90             | ---- |
| P04692   | Tropomyosin alpha-1 chain                                    | 736       | 1.19        | 0.90             | ---- |
| P68511   | 14-3-3 protein eta                                           | 63        | 1.34        | 0.89             | ---- |
| O88989   | Malate dehydrogenase_ cytoplasmic                            | 103       | 1.34        | 0.89             | ---- |
| P11506   | Plasma membrane calcium-transporting ATPase 2                | 71        | 1.40        | 0.89             | ---- |

|        |                                                     |       |      |        |                  |
|--------|-----------------------------------------------------|-------|------|--------|------------------|
| P07943 | Aldose reductase                                    | 254   | 1.17 | 0.88   | ----             |
| Q68FY0 | Cytochrome b-c1 complex subunit 1_<br>mitochondrial | 160   | 1.35 | 0.87   | ----             |
| P70490 | Lactadherin                                         | 112   | 1.27 | 0.87   | ----             |
| P58775 | Tropomyosin beta chain                              | 736   | 1.17 | 0.87   | ----             |
| Q4FZU2 | Keratin_type II cytoskeletal 6A                     | 76    | 1.54 | 0.86   | ----             |
| Q08163 | Adenylyl cyclase-associated protein 1               | 165   | 1.15 | 0.85   | ----             |
| P16617 | Phosphoglycerate kinase 1                           | 73    | 1.55 | 0.84   | ----             |
| P11980 | Pyruvate kinase PKM                                 | 40    | 1.51 | 0.83   | ----             |
| Q61E24 | Inactive ubiquitin carboxyl-terminal hydrolase 54   | 36    | 1.13 | 0.82   | ----             |
| P50399 | Rab GDP dissociation inhibitor beta                 | 52    | 1.65 | 0.81   | ----             |
| P09495 | Tropomyosin alpha-4 chain                           | 50    | 1.22 | 0.81   | ----             |
| Q6IG05 | Keratin_type II cytoskeletal 75                     | 76    | 1.45 | 0.79   | ----             |
| P47819 | Glial fibrillary acidic protein                     | 52    | 1.45 | 0.78   | ----             |
| P01836 | Ig kappa chain C region_ A allele                   | 701   | 1.22 | 0.78   | ----             |
| Q6IG00 | Keratin_type II cytoskeletal 4                      | 52    | 1.49 | 0.77   | ----             |
| P09117 | Fructose-bisphosphate aldolase C                    | 79    | 1.51 | 0.74   | ----             |
| Q63610 | Tropomyosin alpha-3 chain                           | 50    | 1.17 | 0.74   | ----             |
| P15800 | Laminin subunit beta-2                              | 47    | 1.22 | 0.73   | ----             |
| P24090 | Alpha-2-HS-glycoprotein                             | 275   | 1.15 | 0.72   | ----             |
| P14480 | Fibrinogen beta chain                               | 941   | 1.08 | 0.72   | ----             |
| P51886 | Lumican                                             | 1267  | 1.00 | 0.72   | ----             |
| P20759 | Ig gamma-1 chain C region                           | 31    | 1.39 | 0.70   | ----             |
| P01026 | Complement C3                                       | 57    | 1.12 | 0.69   | ----             |
| P13437 | 3-ketoacyl-CoA thiolase_ mitochondrial              | 85    | 1.16 | 0.67   | ----             |
| P45592 | Cofilin-1                                           | 297   | 1.06 | 0.67   | ----             |
| P61983 | 14-3-3 protein gamma                                | 53    | 1.09 | 0.65   | ----             |
| P07632 | Superoxide dismutase [Cu-Zn]                        | 125   | 1.07 | 0.65   | ----             |
| P04764 | Alpha-enolase                                       | 138   | 1.05 | 0.62   | ----             |
| P62260 | 14-3-3 protein epsilon                              | 148   | 1.09 | 0.59   | ----             |
| P11884 | Aldehyde dehydrogenase_ mitochondrial               | 90    | 1.05 | 0.59   | ----             |
| P20059 | Hemopexin                                           | 409   | 1.02 | 0.58   | ----             |
| P68255 | 14-3-3 protein theta                                | 164   | 1.08 | 0.53   | ----             |
| P35213 | 14-3-3 protein beta/alpha                           | 164   | 1.03 | 0.43   | ----             |
| P62982 | Ubiquitin-40S ribosomal protein S27a                | 274   | 0.93 | 0.42   | ----             |
| P04906 | Glutathione S-transferase P                         | 114   | 0.95 | 0.39   | ----             |
| Q66HD0 | Endoplasmic                                         | 51    | 0.90 | 0.37   | ----             |
| Q63429 | Polyubiquitin-C                                     | 274   | 0.92 | 0.35   | ----             |
| P12839 | Neurofilament medium polypeptide                    | 79    | 0.92 | 0.34   | ----             |
| P0CG51 | Polyubiquitin-B                                     | 274   | 0.90 | 0.33   | ----             |
| Q63598 | Plastin-3                                           | 90    | 0.86 | 0.32   | ----             |
| P62986 | Ubiquitin-60S ribosomal protein L40                 | 274   | 0.90 | 0.29   | ----             |
| Q68FU3 | Electron transfer flavoprotein subunit beta         | 536   | 0.68 | 0.19   | ----             |
| P06866 | Haptoglobin                                         | 335   | 0.88 | 0.17   | ----             |
| P11517 | Hemoglobin subunit beta-2                           | 3388  | 0.86 | 0.06   | ----             |
| P01946 | Hemoglobin subunit alpha-1/2                        | 14931 | 0.62 | < 0.01 | ↓                |
| P02091 | Hemoglobin subunit beta-1                           | 10419 | 0.76 | < 0.01 | ↓                |
| P26772 | 10 kDa heat shock protein_ mitochondrial            | 416   |      |        | SHR <sub>P</sub> |
| Q5XI78 | 2-oxoglutarate dehydrogenase_ mitochondrial         | 90    |      |        | SHR <sub>P</sub> |
| P17764 | Acetyl-CoA acetyltransferase_ mitochondrial         | 180   |      |        | SHR <sub>P</sub> |

|               |                                                             |     |  |  |                  |
|---------------|-------------------------------------------------------------|-----|--|--|------------------|
| <i>Q5XIK1</i> | Actin-related protein T1                                    | 73  |  |  | SHR <sub>P</sub> |
| <i>P11030</i> | Acyl-CoA-binding protein                                    | 271 |  |  | SHR <sub>P</sub> |
| <i>P17475</i> | Alpha-1-antiproteinase                                      | 149 |  |  | SHR <sub>P</sub> |
| <i>P10759</i> | AMP deaminase 1                                             | 101 |  |  | SHR <sub>P</sub> |
| <i>Q5M9H0</i> | Ankyrin repeat and SAM domain-containing protein 3          | 98  |  |  | SHR <sub>P</sub> |
| <i>D3ZAF6</i> | ATP synthase subunit f_ mitochondrial                       | 55  |  |  | SHR <sub>P</sub> |
| <i>Q925T8</i> | BMP/retinoic acid-inducible neural-specific protein 1       | 95  |  |  | SHR <sub>P</sub> |
| <i>P0DP29</i> | Calmodulin-1                                                | 145 |  |  | SHR <sub>P</sub> |
| <i>P0DP30</i> | Calmodulin-2                                                | 145 |  |  | SHR <sub>P</sub> |
| <i>P0DP31</i> | Calmodulin-3                                                | 145 |  |  | SHR <sub>P</sub> |
| <i>Q08290</i> | Calponin-1                                                  | 92  |  |  | SHR <sub>P</sub> |
| <i>P18418</i> | Calreticulin                                                | 109 |  |  | SHR <sub>P</sub> |
| <i>P24268</i> | Cathepsin D                                                 | 117 |  |  | SHR <sub>P</sub> |
| <i>Q5U3Z0</i> | Cilia- and flagella-associated protein 298                  | 158 |  |  | SHR <sub>P</sub> |
| <i>P11442</i> | Clathrin heavy chain 1                                      | 71  |  |  | SHR <sub>P</sub> |
| <i>P05371</i> | Clusterin                                                   | 93  |  |  | SHR <sub>P</sub> |
| <i>Q4KM47</i> | Cyclin-dependent kinase 10                                  | 102 |  |  | SHR <sub>P</sub> |
| <i>P14841</i> | Cystatin-C                                                  | 264 |  |  | SHR <sub>P</sub> |
| <i>P11240</i> | Cytochrome c oxidase subunit 5A_ mitochondrial              | 587 |  |  | SHR <sub>P</sub> |
| <i>P10818</i> | Cytochrome c oxidase subunit 6A1_ mitochondrial             | 631 |  |  | SHR <sub>P</sub> |
| <i>Q62871</i> | Cytoplasmic dynein 1 intermediate chain 2                   | 109 |  |  | SHR <sub>P</sub> |
| <i>Q5BK18</i> | Cytosolic iron-sulfur assembly component 3                  | 92  |  |  | SHR <sub>P</sub> |
| <i>Q8K5A9</i> | Death domain-containing membrane protein NRADD              | 70  |  |  | SHR <sub>P</sub> |
| <i>P06214</i> | Delta-aminolevulinic acid dehydratase                       | 75  |  |  | SHR <sub>P</sub> |
| <i>Q62952</i> | Dihydropyrimidinase-related protein 3                       | 103 |  |  | SHR <sub>P</sub> |
| <i>Q62967</i> | Diphosphomevalonate decarboxylase                           | 95  |  |  | SHR <sub>P</sub> |
| <i>Q66HC9</i> | Dynein intermediate chain 2_ axonemal                       | 95  |  |  | SHR <sub>P</sub> |
| <i>Q00911</i> | Early growth response protein 4                             | 140 |  |  | SHR <sub>P</sub> |
| <i>P13803</i> | Electron transfer flavoprotein subunit alpha_ mitochondrial | 189 |  |  | SHR <sub>P</sub> |
| <i>P05197</i> | Elongation factor 2                                         | 108 |  |  | SHR <sub>P</sub> |
| <i>P14604</i> | Enoyl-CoA hydratase_ mitochondrial                          | 46  |  |  | SHR <sub>P</sub> |
| <i>Q5RKI1</i> | Eukaryotic initiation factor 4A-II                          | 92  |  |  | SHR <sub>P</sub> |
| <i>P50609</i> | Fibromodulin                                                | 125 |  |  | SHR <sub>P</sub> |
| <i>Q9WUH4</i> | Four and a half LIM domains protein 1                       | 413 |  |  | SHR <sub>P</sub> |
| <i>P10860</i> | Glutamate dehydrogenase 1_ mitochondrial                    | 253 |  |  | SHR <sub>P</sub> |
| <i>Q99MZ4</i> | Glutathione hydrolase 7                                     | 121 |  |  | SHR <sub>P</sub> |
| <i>Q63406</i> | Guanine nucleotide exchange factor DBS                      | 61  |  |  | SHR <sub>P</sub> |
| <i>P10824</i> | Guanine nucleotide-binding protein G(i) subunit alpha-1     | 104 |  |  | SHR <sub>P</sub> |
| <i>P04897</i> | Guanine nucleotide-binding protein G(i) subunit alpha-2     | 157 |  |  | SHR <sub>P</sub> |
| <i>P08753</i> | Guanine nucleotide-binding protein G(k) subunit alpha       | 104 |  |  | SHR <sub>P</sub> |
| <i>P59215</i> | Guanine nucleotide-binding protein G(o) subunit alpha       | 104 |  |  | SHR <sub>P</sub> |
| <i>P38406</i> | Guanine nucleotide-binding protein G(olf) subunit alpha     | 104 |  |  | SHR <sub>P</sub> |



|        |                                                                      |      |  |  |                  |
|--------|----------------------------------------------------------------------|------|--|--|------------------|
| P63095 | Guanine nucleotide-binding protein G(s) subunit alpha isoforms short | 104  |  |  | SHR <sub>P</sub> |
| Q63803 | Guanine nucleotide-binding protein G(s) subunit alpha isoforms XLas  | 104  |  |  | SHR <sub>P</sub> |
| P29348 | Guanine nucleotide-binding protein G(t) subunit alpha-3              | 104  |  |  | SHR <sub>P</sub> |
| Q63210 | Guanine nucleotide-binding protein subunit alpha-12                  | 101  |  |  | SHR <sub>P</sub> |
| Q6Q7Y5 | Guanine nucleotide-binding protein subunit alpha-13                  | 101  |  |  | SHR <sub>P</sub> |
| Q9Z136 | Hamartin                                                             | 51   |  |  | SHR <sub>P</sub> |
| P62959 | Histidine triad nucleotide-binding protein 1                         | 223  |  |  | SHR <sub>P</sub> |
| Q99MK2 | Histone acetyltransferase KAT5                                       | 156  |  |  | SHR <sub>P</sub> |
| Q00729 | Histone H2B type 1-A                                                 | 1001 |  |  | SHR <sub>P</sub> |
| Q9ESM2 | Hyaluronan and proteoglycan link protein 2                           | 59   |  |  | SHR <sub>P</sub> |
| P20762 | Ig gamma-2C chain C region                                           | 127  |  |  | SHR <sub>P</sub> |
| P01835 | Ig kappa chain C region_ B allele                                    | 2149 |  |  | SHR <sub>P</sub> |
| Q99NA5 | Isocitrate dehydrogenase [NAD] subunit alpha_mitochondrial           | 82   |  |  | SHR <sub>P</sub> |
| Q6IFW6 | Keratin_type I cytoskeletal 10                                       | 74   |  |  | SHR <sub>P</sub> |
| P25030 | Keratin_type I cytoskeletal 20                                       | 65   |  |  | SHR <sub>P</sub> |
| P70615 | Lamin-B1                                                             | 53   |  |  | SHR <sub>P</sub> |
| Q99MZ8 | LIM and SH3 domain protein 1                                         | 97   |  |  | SHR <sub>P</sub> |
| Q5XI07 | Lipoma-preferred partner homolog                                     | 326  |  |  | SHR <sub>P</sub> |
| A1A5P5 | LisH domain-containing protein ARMC9                                 | 128  |  |  | SHR <sub>P</sub> |
| P04642 | L-lactate dehydrogenase A chain                                      | 122  |  |  | SHR <sub>P</sub> |
| P42123 | L-lactate dehydrogenase B chain                                      | 214  |  |  | SHR <sub>P</sub> |
| P30904 | Macrophage migration inhibitory factor                               | 169  |  |  | SHR <sub>P</sub> |
| P02761 | Major urinary protein                                                | 48   |  |  | SHR <sub>P</sub> |
| O35763 | Moesin                                                               | 109  |  |  | SHR <sub>P</sub> |
| P16884 | Neurofilament heavy polypeptide                                      | 96   |  |  | SHR <sub>P</sub> |
| P19527 | Neurofilament light polypeptide                                      | 89   |  |  | SHR <sub>P</sub> |
| O08658 | Nuclear pore complex protein Nup88                                   | 54   |  |  | SHR <sub>P</sub> |
| Q05982 | Nucleoside diphosphate kinase A                                      | 480  |  |  | SHR <sub>P</sub> |
| P19804 | Nucleoside diphosphate kinase B                                      | 447  |  |  | SHR <sub>P</sub> |
| Q63371 | P2Y purinoceptor 6                                                   | 95   |  |  | SHR <sub>P</sub> |
| P27657 | Pancreatic triacylglycerol lipase                                    | 58   |  |  | SHR <sub>P</sub> |
| P52944 | PDZ and LIM domain protein 1                                         | 213  |  |  | SHR <sub>P</sub> |
| Q66HS7 | PDZ and LIM domain protein 3                                         | 128  |  |  | SHR <sub>P</sub> |
| Q62920 | PDZ and LIM domain protein 5                                         | 93   |  |  | SHR <sub>P</sub> |
| Q9Z1Z9 | PDZ and LIM domain protein 7                                         | 118  |  |  | SHR <sub>P</sub> |
| Q63716 | Peroxiredoxin-1                                                      | 105  |  |  | SHR <sub>P</sub> |
| Q9Z221 | Polyamine-modulated factor 1-binding protein 1                       | 106  |  |  | SHR <sub>P</sub> |
| D4ABH7 | Pre-miRNA 5'-monophosphate methyltransferase                         | 148  |  |  | SHR <sub>P</sub> |
| P04785 | Protein disulfide-isomerase                                          | 91   |  |  | SHR <sub>P</sub> |
| Q9QZQ5 | Protein NOV homolog                                                  | 256  |  |  | SHR <sub>P</sub> |
| P05964 | Protein S100-A6                                                      | 1473 |  |  | SHR <sub>P</sub> |
| P98106 | P-selectin                                                           | 57   |  |  | SHR <sub>P</sub> |
| P49432 | Pyruvate dehydrogenase E1 component subunit beta_mitochondrial       | 53   |  |  | SHR <sub>P</sub> |
| P29315 | Ribonuclease inhibitor                                               | 58   |  |  | SHR <sub>P</sub> |

|        |                                                                        |     |  |  |                  |
|--------|------------------------------------------------------------------------|-----|--|--|------------------|
| P57760 | Serine/threonine-protein kinase 16                                     | 110 |  |  | SHR <sub>P</sub> |
| Q9QWN8 | Spectrin beta chain_ non-erythrocytic 2                                | 54  |  |  | SHR <sub>P</sub> |
| G3V7P1 | Syntaxin-12                                                            | 92  |  |  | SHR <sub>P</sub> |
| Q63635 | Syntaxin-6                                                             | 91  |  |  | SHR <sub>P</sub> |
| Q5XHX6 | Thioredoxin domain-containing protein 2                                | 55  |  |  | SHR <sub>P</sub> |
| Q6IE14 | Transmembrane protease serine 11B-like protein                         | 106 |  |  | SHR <sub>P</sub> |
| P02767 | Transthyretin                                                          | 216 |  |  | SHR <sub>P</sub> |
| P27435 | Tryptase                                                               | 591 |  |  | SHR <sub>P</sub> |
| Q9EQT5 | Tubulointerstitial nephritis antigen-like                              | 310 |  |  | SHR <sub>P</sub> |
| Q498R7 | UPF0587 protein C1orf123 homolog                                       | 79  |  |  | SHR <sub>P</sub> |
| Q6AY86 | Vacuolar protein sorting-associated protein 26A                        | 104 |  |  | SHR <sub>P</sub> |
| O54975 | Xaa-Pro aminopeptidase 1                                               | 107 |  |  | SHR <sub>P</sub> |
| P80299 | Bifunctional epoxide hydrolase 2                                       | 47  |  |  | SHR <sub>C</sub> |
| Q4V8E4 | Cilia- and flagella-associated protein 36                              | 83  |  |  | SHR <sub>C</sub> |
| O55096 | Dipeptidyl peptidase 3                                                 | 45  |  |  | SHR <sub>C</sub> |
| Q91XQ4 | DNA-directed RNA polymerase II subunit<br>GRINL1A                      | 69  |  |  | SHR <sub>C</sub> |
| Q62862 | Dual specificity mitogen-activated protein kinase<br>kinase 5          | 67  |  |  | SHR <sub>C</sub> |
| Q5EZ72 | Ectonucleotide<br>pyrophosphatase/phosphodiesterase family<br>member 7 | 42  |  |  | SHR <sub>C</sub> |
| Q66H04 | F-box only protein 43                                                  | 68  |  |  | SHR <sub>C</sub> |
| P13255 | Glycine N-methyltransferase                                            | 44  |  |  | SHR <sub>C</sub> |
| Q5XHZ0 | Heat shock protein 75 kDa_ mitochondrial                               | 47  |  |  | SHR <sub>C</sub> |
| P06762 | Heme oxygenase 1                                                       | 60  |  |  | SHR <sub>C</sub> |
| E9PU28 | Inosine-5'-monophosphate dehydrogenase 2                               | 79  |  |  | SHR <sub>C</sub> |
| Q99J82 | Integrin-linked protein kinase                                         | 75  |  |  | SHR <sub>C</sub> |
| P18588 | Interferon-induced GTP-binding protein Mx1                             | 61  |  |  | SHR <sub>C</sub> |
| P56574 | Isocitrate dehydrogenase [NADP]_ mitochondrial                         | 74  |  |  | SHR <sub>C</sub> |
| Q5U2U7 | mRNA cap guanine-N7 methyltransferase                                  | 99  |  |  | SHR <sub>C</sub> |
| A7E3N2 | Neutrophil cytosol factor 2                                            | 52  |  |  | SHR <sub>C</sub> |
| O88767 | Protein/nucleic acid deglycase DJ-1                                    | 229 |  |  | SHR <sub>C</sub> |
| Q9JK11 | Reticulon-4                                                            | 39  |  |  | SHR <sub>C</sub> |
| P42346 | Serine/threonine-protein kinase mTOR                                   | 52  |  |  | SHR <sub>C</sub> |
| D3ZVU1 | SprT-like domain-containing protein Spartan                            | 72  |  |  | SHR <sub>C</sub> |
| P01048 | T-kininogen 1                                                          | 55  |  |  | SHR <sub>C</sub> |

<sup>a</sup> identification of proteins in the Uniprot database (<http://www.uniprot.org/>).

<sup>b</sup> Significant difference in expression proteins up regulation, down regulation and intermediates.

<sup>c</sup> p value (p<0.05).

<sup>d</sup> Up regulated ( ↑ ), Intermediate ( ----, present in both comparison groups), down regulated ( ↓ ) and unique each comparison group ( SHR<sub>P</sub> and SHR<sub>C</sub>).

\*\*Adapted with permission from ref 15.

**Table S4.** The protein of comparison SHR<sub>T</sub> vs. SHR<sub>C</sub>. 123 proteins were identified, with 7 *upregulated* and 22 *downregulated* significantly in the first group of the comparison and unique from each group with p<0.05.

| <i>Accession <sup>a</sup></i> | <i>Description</i>                          | <i>Score</i> | <i>SHR<sub>T</sub>: SHR<sub>C</sub> Ratio</i><br><i><sup>b</sup></i> | <i>SHR<sub>T</sub>: SHR<sub>C</sub></i><br><i><sup>c</sup></i><br><i>__P</i> | <i>Up / intermediate /</i><br><i>Down / Unique</i> |
|-------------------------------|---------------------------------------------|--------------|----------------------------------------------------------------------|------------------------------------------------------------------------------|----------------------------------------------------|
| P68035                        | Actin_ alpha cardiac muscle 1               | 5542         | 1.32                                                                 | < 0.01                                                                       | ↑                                                  |
| P63269                        | Actin_ gamma-enteric smooth muscle          | 5534         | 1.32                                                                 | < 0.01                                                                       | ↑                                                  |
| P47853                        | Biglycan                                    | 227          | 1.57                                                                 | < 0.01                                                                       | ↑                                                  |
| P06761                        | Endoplasmic reticulum chaperone BiP         | 248          | 1.34                                                                 | < 0.01                                                                       | ↑                                                  |
| <b>P70490</b>                 | <b>Lactadherin</b>                          | <b>112</b>   | <b>3.16</b>                                                          | <b>&lt; 0.01</b>                                                             | ↑                                                  |
| Q6AY56                        | Tubulin alpha-8 chain                       | 46           | 1.86                                                                 | < 0.01                                                                       | ↑                                                  |
| Q9JLT0                        | Myosin-10                                   | 71           | 1.31                                                                 | 0.02                                                                         | ↑                                                  |
| P21807                        | Peripherin                                  | 195          | 1.38                                                                 | 0.95                                                                         | ----                                               |
| Q6AYZ1                        | Tubulin alpha-1C chain                      | 237          | 1.15                                                                 | 0.95                                                                         | ----                                               |
| P01026                        | Complement C3                               | 57           | 1.43                                                                 | 0.94                                                                         | ----                                               |
| P48675                        | Desmin                                      | 467          | 1.13                                                                 | 0.94                                                                         | ----                                               |
| P16636                        | Protein-lysine 6-oxidase V=2                | 251          | 1.42                                                                 | 0.94                                                                         | ----                                               |
| Q68FR8                        | Tubulin alpha-3 chain                       | 111          | 1.23                                                                 | 0.93                                                                         | ----                                               |
| P58775                        | Tropomyosin beta chain                      | 736          | 1.20                                                                 | 0.92                                                                         | ----                                               |
| P06762                        | Heme oxygenase 1                            | 60           | 1.54                                                                 | 0.89                                                                         | ----                                               |
| Q62736                        | Non-muscle caldesmon                        | 274          | 1.39                                                                 | 0.89                                                                         | ----                                               |
| P68370                        | Tubulin alpha-1A chain                      | 237          | 1.14                                                                 | 0.89                                                                         | ----                                               |
| Q5XIF6                        | Tubulin alpha-4A chain                      | 107          | 1.19                                                                 | 0.89                                                                         | ----                                               |
| Q6P9V9                        | Tubulin alpha-1B chain                      | 237          | 1.12                                                                 | 0.87                                                                         | ----                                               |
| P01836                        | Ig kappa chain C region_ A allele           | 701          | 1.25                                                                 | 0.86                                                                         | ----                                               |
| P23565                        | Alpha-internexin                            | 69           | 1.20                                                                 | 0.85                                                                         | ----                                               |
| P20761                        | Ig gamma-2B chain C region                  | 130          | 1.19                                                                 | 0.85                                                                         | ----                                               |
| Q63598                        | Plastin-3                                   | 90           | 1.52                                                                 | 0.85                                                                         | ----                                               |
| P11762                        | Galectin-1                                  | 260          | 1.22                                                                 | 0.84                                                                         | ----                                               |
| P07943                        | Aldose reductase OS=Rattus<br>norvegicus    | 254          | 1.21                                                                 | 0.83                                                                         | ----                                               |
| Q5XI73                        | Rho GDP-dissociation inhibitor 1            | 327          | 1.19                                                                 | 0.83                                                                         | ----                                               |
| P04692                        | Tropomyosin alpha-1 chain                   | 736          | 1.19                                                                 | 0.83                                                                         | ----                                               |
| P12839                        | Neurofilament medium polypeptide            | 79           | 1.12                                                                 | 0.81                                                                         | ----                                               |
| P14668                        | Annexin A5                                  | 145          | 1.15                                                                 | 0.80                                                                         | ----                                               |
| P18666                        | Myosin regulatory light chain 12B           | 975          | 1.13                                                                 | 0.79                                                                         | ----                                               |
| P13832                        | Myosin regulatory light chain RLC-A         | 975          | 1.11                                                                 | 0.78                                                                         | ----                                               |
| Q6IG00                        | Keratin_ type II cytoskeletal 4             | 52           | 1.72                                                                 | 0.77                                                                         | ----                                               |
| P04764                        | Alpha-enolase                               | 138          | 1.16                                                                 | 0.75                                                                         | ----                                               |
| P63102                        | 14-3-3 protein zeta/delta                   | 142          | 1.17                                                                 | 0.74                                                                         | ----                                               |
| P07150                        | Annexin A1                                  | 94           | 1.20                                                                 | 0.74                                                                         | ----                                               |
| P11598                        | Protein disulfide-isomerase A3              | 100          | 1.22                                                                 | 0.74                                                                         | ----                                               |
| O88989                        | Malate dehydrogenase_ cytoplasmic           | 103          | 1.23                                                                 | 0.73                                                                         | ----                                               |
| P47819                        | Glial fibrillary acidic protein             | 52           | 1.43                                                                 | 0.72                                                                         | ----                                               |
| Q6IG05                        | Keratin_ type II cytoskeletal 75            | 76           | 1.31                                                                 | 0.71                                                                         | ----                                               |
| E9PU28                        | Inosine-5'-monophosphate<br>dehydrogenase 2 | 79           | 1.54                                                                 | 0.70                                                                         | ----                                               |
| P09495                        | Tropomyosin alpha-4 chain                   | 50           | 1.27                                                                 | 0.70                                                                         | ----                                               |
| P25113                        | Phosphoglycerate mutase 1                   | 276          | 1.25                                                                 | 0.68                                                                         | ----                                               |
| Q3KRE8                        | Tubulin beta-2B chain                       | 94           | 1.05                                                                 | 0.68                                                                         | ----                                               |
| P14480                        | Fibrinogen beta chain                       | 941          | 1.05                                                                 | 0.67                                                                         | ----                                               |

|        |                                                    |      |      |      |      |
|--------|----------------------------------------------------|------|------|------|------|
| D3ZVU1 | SprT-like domain-containing protein<br>Spartan     | 72   | 1.13 | 0.67 | ---- |
| P05065 | Fructose-bisphosphate aldolase A                   | 202  | 1.07 | 0.66 | ---- |
| Q6P6Q2 | Keratin_ type II cytoskeletal 5                    | 76   | 1.16 | 0.66 | ---- |
| Q63610 | Tropomyosin alpha-3 chain                          | 50   | 1.21 | 0.66 | ---- |
| P69897 | Tubulin beta-5 chain                               | 94   | 1.03 | 0.66 | ---- |
| Q4QRB4 | Tubulin beta-3 chain                               | 94   | 1.04 | 0.65 | ---- |
| P08010 | Glutathione S-transferase Mu 2                     | 217  | 1.14 | 0.64 | ---- |
| P55063 | Heat shock 70 kDa protein 1-like                   | 597  | 1.03 | 0.64 | ---- |
| P85108 | Tubulin beta-2A chain                              | 94   | 1.04 | 0.64 | ---- |
| Q61G12 | Keratin_ type II cytoskeletal 7                    | 193  | 1.09 | 0.63 | ---- |
| Q4FZU2 | Keratin_ type II cytoskeletal 6A                   | 76   | 1.17 | 0.61 | ---- |
| Q62812 | Myosin-9                                           | 68   | 1.03 | 0.60 | ---- |
| P11980 | Pyruvate kinase PKM                                | 40   | 1.12 | 0.59 | ---- |
| P62632 | Elongation factor 1-alpha 2                        | 51   | 1.28 | 0.58 | ---- |
| P31232 | Transgelin                                         | 9127 | 1.02 | 0.58 | ---- |
| P34058 | Heat shock protein HSP 90-beta                     | 106  | 1.17 | 0.56 | ---- |
| Q6P9T8 | Tubulin beta-4B chain                              | 467  | 1.01 | 0.56 | ---- |
| P56574 | Isocitrate dehydrogenase [NADP]_<br>mitochondrial  | 74   | 1.20 | 0.55 | ---- |
| P48037 | Annexin A6                                         | 120  | 0.99 | 0.52 | ---- |
| P15999 | ATP synthase subunit alpha_<br>mitochondrial       | 175  | 1.04 | 0.52 | ---- |
| Q10758 | Keratin_ type II cytoskeletal 8                    | 193  | 1.04 | 0.52 | ---- |
| P85973 | Purine nucleoside phosphorylase                    | 155  | 0.98 | 0.50 | ---- |
| P14659 | Heat shock-related 70 kDa protein 2                | 691  | 0.99 | 0.49 | ---- |
| P20059 | Hemopexin                                          | 409  | 0.99 | 0.46 | ---- |
| P62630 | Elongation factor 1-alpha 1                        | 298  | 0.98 | 0.45 | ---- |
| P70623 | Fatty acid-binding protein_ adipocyte              | 436  | 0.94 | 0.40 | ---- |
| P16409 | Myosin light chain 3                               | 787  | 0.95 | 0.40 | ---- |
| P45592 | Cofilin-1                                          | 297  | 0.96 | 0.38 | ---- |
| P04636 | Malate dehydrogenase_<br>mitochondrial             | 346  | 0.90 | 0.38 | ---- |
| P04906 | Glutathione S-transferase P                        | 114  | 0.81 | 0.35 | ---- |
| P07632 | Superoxide dismutase [Cu-Zn]                       | 125  | 0.78 | 0.34 | ---- |
| P63018 | Heat shock cognate 71 kDa protein                  | 852  | 0.96 | 0.33 | ---- |
| P62982 | Ubiquitin-40S ribosomal protein S27a               | 274  | 0.82 | 0.31 | ---- |
| P06399 | Fibrinogen alpha chain                             | 112  | 0.90 | 0.30 | ---- |
| Q63429 | Polyubiquitin-C                                    | 274  | 0.84 | 0.30 | ---- |
| Q9JK11 | Reticulon-4                                        | 39   | 0.27 | 0.30 | ---- |
| Q08163 | Adenylyl cyclase-associated protein 1              | 165  | 0.90 | 0.28 | ---- |
| Q9ER34 | Aconitate hydratase_ mitochondrial                 | 83   | 0.86 | 0.27 | ---- |
| P24090 | Alpha-2-HS-glycoprotein                            | 275  | 0.77 | 0.27 | ---- |
| Q9WVH8 | Fibulin-5                                          | 52   | 0.97 | 0.27 | ---- |
| P0CG51 | Polyubiquitin-B                                    | 274  | 0.84 | 0.25 | ---- |
| Q07936 | Annexin A2                                         | 474  | 0.88 | 0.24 | ---- |
| P62986 | Ubiquitin-60S ribosomal protein L40 2              | 274  | 0.83 | 0.24 | ---- |
| P02680 | Fibrinogen gamma chain                             | 682  | 0.90 | 0.23 | ---- |
| P0DMW1 | Heat shock 70 kDa protein 1B                       | 845  | 0.92 | 0.23 | ---- |
| P02600 | Myosin light chain 1/3_ skeletal<br>muscle isoform | 809  | 0.88 | 0.23 | ---- |
| P31000 | Vimentin                                           | 1733 | 0.96 | 0.21 | ---- |

|        |                                                           |              |             |                  |                  |
|--------|-----------------------------------------------------------|--------------|-------------|------------------|------------------|
| P15650 | Long-chain specific acyl-CoA dehydrogenase_ mitochondrial | 93           | 0.84        | 0.18             | ----             |
| P13437 | 3-ketoacyl-CoA thiolase_ mitochondrial                    | 85           | 0.58        | 0.15             | ----             |
| Q5RKI0 | WD repeat-containing protein 1                            | 192          | 0.89        | 0.15             | ----             |
| Q66HD0 | Endoplasmic                                               | 51           | 0.50        | 0.14             | ----             |
| P12346 | Serotransferrin                                           | 1002         | 0.90        | 0.13             | ----             |
| P62963 | Profilin-1                                                | 3064         | 0.90        | 0.11             | ----             |
| P0DMW0 | Heat shock 70 kDa protein 1A                              | 849          | 0.86        | 0.10             | ----             |
| Q9QXQ0 | Alpha-actinin-4                                           | 431          | 0.88        | 0.08             | ----             |
| Q4V8H8 | EH domain-containing protein 2                            | 225          | 0.61        | 0.06             | ----             |
| P10719 | ATP synthase subunit beta_ mitochondrial                  | 87           | 0.84        | 0.05             | ----             |
| P47875 | Cysteine and glycine-rich protein 1                       | 1148         | 0.84        | 0.04             | ↓                |
| Q7M0E3 | Dextrin                                                   | 1706         | 0.81        | 0.04             | ↓                |
| P02454 | Collagen alpha-1(I) chain                                 | 47           | 0.63        | 0.03             | ↓                |
| P06866 | Haptoglobin                                               | 335          | 0.76        | 0.03             | ↓                |
| P50399 | Rab GDP dissociation inhibitor beta                       | 52           | 0.23        | 0.01             | ↓                |
| P68136 | Actin_ alpha skeletal muscle                              | 5242         | 0.84        | < 0.01           | ↓                |
| P62738 | Actin_ aortic smooth muscle                               | 5534         | 0.87        | < 0.01           | ↓                |
| P60711 | Actin_ cytoplasmic 1                                      | 4354         | 0.77        | < 0.01           | ↓                |
| P63259 | Actin_ cytoplasmic 2                                      | 4358         | 0.77        | < 0.01           | ↓                |
| Q9Z1P2 | Alpha-actinin-1                                           | 719          | 0.78        | < 0.01           | ↓                |
| P36201 | Cysteine-rich protein 2                                   | 176          | 0.55        | < 0.01           | ↓                |
| P04797 | Glyceraldehyde-3-phosphate dehydrogenase                  | 1896         | 0.65        | < 0.01           | ↓                |
| P42930 | Heat shock protein beta-1                                 | 848          | 0.76        | < 0.01           | ↓                |
| P01946 | <b>Hemoglobin subunit alpha-1/2</b>                       | <b>14931</b> | <b>0.43</b> | <b>&lt; 0.01</b> | ↓                |
| P02091 | <b>Hemoglobin subunit beta-1</b>                          | <b>10419</b> | <b>0.32</b> | <b>&lt; 0.01</b> | ↓                |
| P11517 | <b>Hemoglobin subunit beta-2</b>                          | <b>3388</b>  | <b>0.32</b> | <b>&lt; 0.01</b> | ↓                |
| P20760 | Ig gamma-2A chain C region                                | 643          | 0.68        | < 0.01           | ↓                |
| P51886 | <b>Lumican</b>                                            | <b>1267</b>  | <b>0.45</b> | <b>&lt; 0.01</b> | ↓                |
| Q64119 | Myosin light polypeptide 6                                | 13395        | 0.79        | < 0.01           | ↓                |
| Q64122 | Myosin regulatory light polypeptide 9                     | 4053         | 0.74        | < 0.01           | ↓                |
| P10111 | Peptidyl-prolyl cis-trans isomerase A                     | 1750         | 0.72        | < 0.01           | ↓                |
| P02770 | Serum albumin                                             | 7160         | 0.74        | < 0.01           | ↓                |
| P26772 | 10 kDa heat shock protein_ mitochondrial                  | 124          |             |                  | SHR <sub>T</sub> |
| B0BN56 | 28S ribosomal protein S31_ mitochondrial                  | 262          |             |                  | SHR <sub>T</sub> |
| Q7TP48 | Adipocyte plasma membrane-associated protein              | 74           |             |                  | SHR <sub>T</sub> |
| P17475 | Alpha-1-antiproteinase                                    | 87           |             |                  | SHR <sub>T</sub> |
| Q78E60 | Aryl hydrocarbon receptor nuclear translocator 2          | 81           |             |                  | SHR <sub>T</sub> |
| Q701R3 | Beta-galactoside alpha-2_6-sialyltransferase 2            | 84           |             |                  | SHR <sub>T</sub> |
| Q08290 | Calponin-1                                                | 62           |             |                  | SHR <sub>T</sub> |
| P11442 | Clathrin heavy chain 1                                    | 27           |             |                  | SHR <sub>T</sub> |
| P56745 | Claudin-1                                                 | 133          |             |                  | SHR <sub>T</sub> |
| Q62952 | Dihydropyrimidinase-related protein 3                     | 154          |             |                  | SHR <sub>T</sub> |
| Q9Z1Z3 | Epsin-2                                                   | 43           |             |                  | SHR <sub>T</sub> |
| Q9ERW3 | Fibroblast growth factor 13                               | 84           |             |                  | SHR <sub>T</sub> |

|        |                                                          |     |                  |
|--------|----------------------------------------------------------|-----|------------------|
| P50609 | Fibromodulin                                             | 241 | SHR <sub>T</sub> |
| Q9WUH4 | Four and a half LIM domains protein 1                    | 573 | SHR <sub>T</sub> |
| P10860 | Glutamate dehydrogenase 1_mitochondrial                  | 113 | SHR <sub>T</sub> |
| P97879 | Glutamate receptor-interacting protein 1                 | 85  | SHR <sub>T</sub> |
| Q0VGK3 | Glycerate kinase                                         | 118 | SHR <sub>T</sub> |
| Q510D1 | Glyoxalase domain-containing protein 4                   | 57  | SHR <sub>T</sub> |
| Q63406 | Guanine nucleotide exchange factor DBS                   | 29  | SHR <sub>T</sub> |
| P01835 | Ig kappa chain C region_ B allele                        | 209 | SHR <sub>T</sub> |
| D4AD37 | Inositol monophosphatase 3                               | 95  | SHR <sub>T</sub> |
| Q566E5 | KDEL motif-containing protein 2                          | 131 | SHR <sub>T</sub> |
| O35806 | Latent-transforming growth factor beta-binding protein 2 | 66  | SHR <sub>T</sub> |
| Q5XI07 | Lipoma-preferred partner homolog                         | 119 | SHR <sub>T</sub> |
| P42123 | L-lactate dehydrogenase B chain                          | 137 | SHR <sub>T</sub> |
| Q5BK54 | Lymphocyte activation gene 3 protein                     | 78  | SHR <sub>T</sub> |
| P08494 | Matrix Gla protein                                       | 185 | SHR <sub>T</sub> |
| D3ZSK5 | N-lysine methyltransferase SETD6                         | 313 | SHR <sub>T</sub> |
| Q05982 | Nucleoside diphosphate kinase A                          | 283 | SHR <sub>T</sub> |
| P19804 | Nucleoside diphosphate kinase B                          | 256 | SHR <sub>T</sub> |
| Q66HS7 | PDZ and LIM domain protein 3                             | 56  | SHR <sub>T</sub> |
| O08561 | Phosphatidylinositol 4-kinase beta                       | 26  | SHR <sub>T</sub> |
| O88422 | Polypeptide N-acetylgalactosaminyltransferase 5          | 61  | SHR <sub>T</sub> |
| Q9ERS0 | Potassium channel subfamily K member 13                  | 71  | SHR <sub>T</sub> |
| Q9QZQ5 | Protein NOV homolog                                      | 253 | SHR <sub>T</sub> |
| P83900 | Rap guanine nucleotide exchange factor 5                 | 132 | SHR <sub>T</sub> |
| I6L9G5 | Reticulocalbin-3                                         | 69  | SHR <sub>T</sub> |
| D3ZA76 | Serine protease HTRA3                                    | 197 | SHR <sub>T</sub> |
| P57760 | Serine/threonine-protein kinase 16                       | 155 | SHR <sub>T</sub> |
| O70142 | SHC-transforming protein 2                               | 86  | SHR <sub>T</sub> |
| Q9QWN8 | Spectrin beta chain_ non-erythrocytic 2                  | 36  | SHR <sub>T</sub> |
| P17246 | Transforming growth factor beta-1 proprotein             | 64  | SHR <sub>T</sub> |
| P46462 | Transitional endoplasmic reticulum ATPase                | 67  | SHR <sub>T</sub> |
| O08700 | Vacuolar protein sorting-associated protein 45           | 128 | SHR <sub>T</sub> |
| P35213 | 14-3-3 protein beta/alpha                                | 164 | SHR <sub>C</sub> |
| P62260 | 14-3-3 protein epsilon                                   | 148 | SHR <sub>C</sub> |
| P68511 | 14-3-3 protein eta                                       | 63  | SHR <sub>C</sub> |
| P61983 | 14-3-3 protein gamma                                     | 53  | SHR <sub>C</sub> |
| P68255 | 14-3-3 protein theta                                     | 164 | SHR <sub>C</sub> |
| P11884 | Aldehyde dehydrogenase_mitochondrial                     | 90  | SHR <sub>C</sub> |
| P80299 | Bifunctional epoxide hydrolase 2                         | 47  | SHR <sub>C</sub> |
| P85125 | Caveolae-associated protein 1                            | 150 | SHR <sub>C</sub> |

|        |                                                                  |     |                  |
|--------|------------------------------------------------------------------|-----|------------------|
| Q4V8E4 | Cilia- and flagella-associated protein 36                        | 83  | SHR <sub>c</sub> |
| Q68FY0 | Cytochrome b-c1 complex subunit 1_mitochondrial                  | 160 | SHR <sub>c</sub> |
| Q01129 | Decorin                                                          | 150 | SHR <sub>c</sub> |
| O55096 | Dipeptidyl peptidase 3                                           | 45  | SHR <sub>c</sub> |
| Q91XQ4 | DNA-directed RNA polymerase II subunit GRINL1A                   | 69  | SHR <sub>c</sub> |
| Q62862 | Dual specificity mitogen-activated protein kinase kinase 5       | 67  | SHR <sub>c</sub> |
| Q5EZ72 | Ectonucleotide pyrophosphatase/phosphodiesterase family member 7 | 42  | SHR <sub>c</sub> |
| Q68FU3 | Electron transfer flavoprotein subunit beta                      | 536 | SHR <sub>c</sub> |
| Q66H04 | F-box only protein 43                                            | 68  | SHR <sub>c</sub> |
| P09117 | Fructose-bisphosphate aldolase C                                 | 79  | SHR <sub>c</sub> |
| P13255 | Glycine N-methyltransferase                                      | 44  | SHR <sub>c</sub> |
| Q5XHZ0 | Heat shock protein 75 kDa_mitochondrial                          | 47  | SHR <sub>c</sub> |
| Q00715 | Histone H2B type 1                                               | 122 | SHR <sub>c</sub> |
| A6YP92 | Homeobox protein ARX                                             | 33  | SHR <sub>c</sub> |
| P20759 | Ig gamma-1 chain C region                                        | 31  | SHR <sub>c</sub> |
| Q6IE24 | Inactive ubiquitin carboxyl-terminal hydrolase 54                | 36  | SHR <sub>c</sub> |
| Q99J82 | Integrin-linked protein kinase                                   | 75  | SHR <sub>c</sub> |
| P18588 | Interferon-induced GTP-binding protein Mx1                       | 61  | SHR <sub>c</sub> |
| P15800 | Laminin subunit beta-2                                           | 47  | SHR <sub>c</sub> |
| Q5U2U7 | mRNA cap guanine-N7 methyltransferase                            | 99  | SHR <sub>c</sub> |
| A7E3N2 | Neutrophil cytosol factor 2                                      | 52  | SHR <sub>c</sub> |
| P16617 | Phosphoglycerate kinase 1                                        | 73  | SHR <sub>c</sub> |
| P11506 | Plasma membrane calcium-transporting ATPase 2                    | 71  | SHR <sub>c</sub> |
| O88767 | Protein/nucleic acid deglycase DJ-1                              | 229 | SHR <sub>c</sub> |
| P50398 | Rab GDP dissociation inhibitor alpha                             | 112 | SHR <sub>c</sub> |
| P42346 | Serine/threonine-protein kinase mTOR                             | 52  | SHR <sub>c</sub> |
| P01048 | T-kininogen 1                                                    | 55  | SHR <sub>c</sub> |
| P50137 | Transketolase                                                    | 50  | SHR <sub>c</sub> |

<sup>a</sup> identification of proteins in the Uniprot database (<http://www.uniprot.org/>).

<sup>b</sup> Significant difference in expression proteins up regulation, down regulation and intermediates.

<sup>c</sup> p value (p<0.05) .

<sup>d</sup> Up regulated ( ↑ ), Intermediate ( ----, present in both comparison groups), down regulated ( ↓ ) and unique each comparison group ( SHR<sub>T</sub> and SHR<sub>c</sub>).

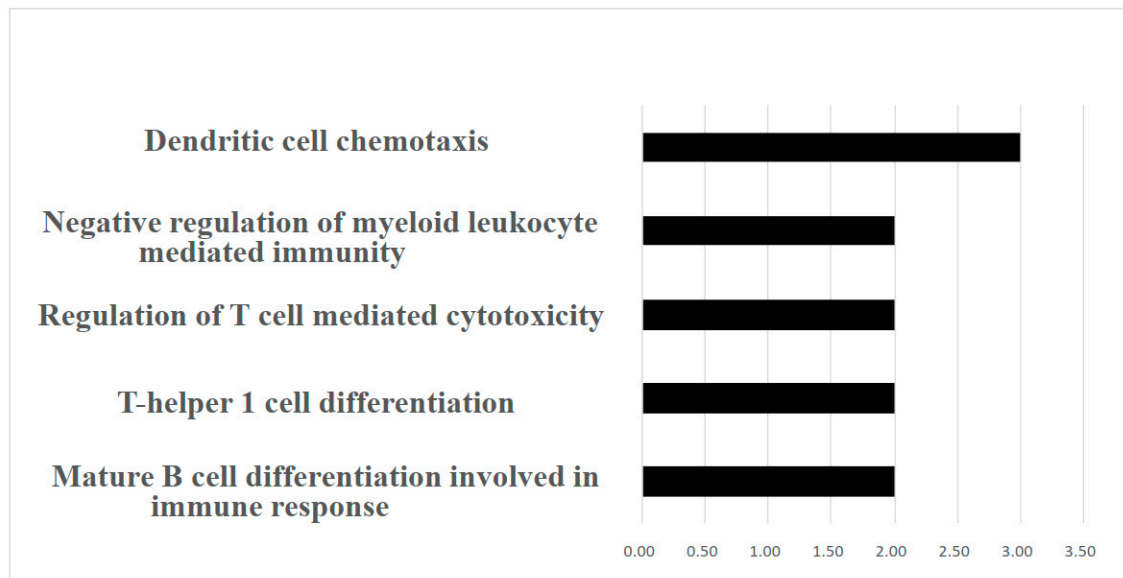

**Figure S1:** Protein analysis in ClueGO plugins and the number of genes involved within the sistem immune category between SHR<sub>P</sub> vs. SHR<sub>C</sub> groups.

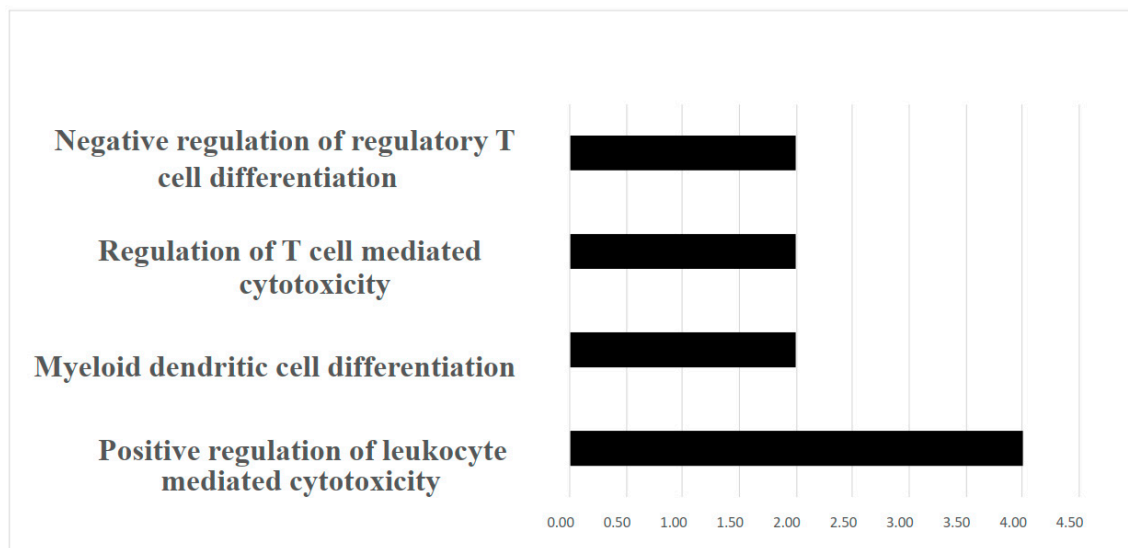

**Figure S2 :** Protein analysis in ClueGO plug-ins and the number of genes involved within the sistem immune category between SHR<sub>T</sub> vs. SHR<sub>C</sub> groups
